## CORRECTION

# Correction: Neural specificity of the RNA-binding protein Elav is achieved by post-transcriptional repression in non-neural tissues

Piero Sanfilippo, Peter Smibert, Hong Duan and Eric C. Lai

There were errors published in *Development* **143**, 4474-4485.

In Figs 1A-D and 2A,B,H,I,J, the  $+/+$  labels should have been  $+/-$ .

Owing to production errors, the wrong images were included as Figs 2B', 3B,B' and 5C'.

The online version of the article has been corrected accordingly. These changes have no impact on the results or the conclusions of the study.

We apologise to the authors and readers for this mistake.
